# Supplementary material for: Clustering of housekeeping genes provides a unified model of gene order in the human genome
Source: Springer Nature journal article supplement (doi:10.1038/ng887), 2002-05-06
Supplement: ng887-S1.pdf [file ng887-S1.pdf]

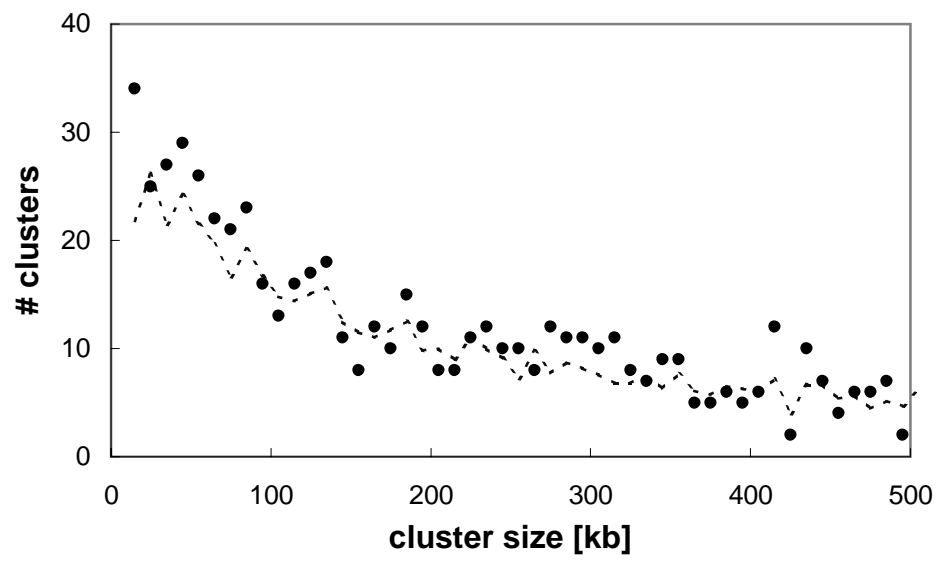

**Web Fig. A** Distribution of physical cluster sizes. The dotted line shows expectations from 1,000,000 random permutations of gene positions. There is an excess of observed over expected clusters up to approximately 350 kb.
