# Supplementary material for: Clustering of housekeeping genes provides a unified model of gene order in the human genome
Source: Springer Nature journal article supplement (doi:10.1038/ng887), 2002-05-06
Supplement: ng887-S2.pdf [file ng887-S2.pdf]

**Table A:** The largest un-interrupted cluster of co-expressed genes ( $ICE_{a,b} \geq 0.5$  for all gene pairs), located on chromosome 16, 492 – 772 kb. Tissue-specific expression rates are given in counts per million.

| UniGene ID | gene            | CDS start | CDS end | strand | breadth | white matter | prostate | vascular endothelium | mammary gland epithelium | colon epithelium | ovary epithelium | lung | kidney embryonic | pancreas epithelium | peritoneum | astrocyte | leukocyte | thalamus | kidney |
|------------|-----------------|-----------|---------|--------|---------|--------------|----------|----------------------|--------------------------|------------------|------------------|------|------------------|---------------------|------------|-----------|-----------|----------|--------|
| Hs.279869  | <i>MAAT1</i>    | 491604    | 493054  | -      | 12      | 91           | 53       | 36                   | 47                       | 20               | 52               | 34   | 88               | 62                  | 0          | 57        | 0         | 62       | 48     |
| Hs.288940  | <i>M83</i>      | 495916    | 505751  | -      | 7       | 0            | 0        | 36                   | 19                       | 40               | 21               | 22   | 0                | 31                  | 0          | 38        | 0         | 0        | 0      |
| Hs.9235    | <i>NME4</i>     | 521152    | 524272  | +      | 10      | 33           | 93       | 127                  | 0                        | 0                | 134              | 22   | 133              | 62                  | 37         | 134       | 0         | 62       | 0      |
| Hs.15898   | <i>DECR2</i>    | 525893    | 535508  | +      | 9       | 26           | 33       | 18                   | 19                       | 40               | 0                | 0    | 29               | 46                  | 0          | 38        | 0         | 0        | 72     |
| Hs.119004  | <i>KIAA0665</i> | 549936    | 644769  | +      | 9       | 78           | 27       | 63                   | 28                       | 20               | 0                | 0    | 0                | 31                  | 0          | 38        | 0         | 62       | 72     |
| Hs.55836   | <i>SOLH</i>     | 670768    | 677446  | +      | 7       | 0            | 13       | 27                   | 28                       | 90               | 21               | 0    | 44               | 124                 | 0          | 0         | 0         | 0        | 0      |
| Hs.18079   | <i>PIGQ</i>     | 698004    | 706965  | +      | 8       | 39           | 20       | 36                   | 37                       | 20               | 0                | 0    | 0                | 77                  | 0          | 96        | 0         | 0        | 48     |
| Hs.239500  | <i>MGC13114</i> | 758526    | 760220  | -      | 12      | 143          | 220      | 109                  | 121                      | 20               | 52               | 34   | 103              | 201                 | 0          | 134       | 0         | 83       | 97     |
| Hs.41514   | <i>MGC15416</i> | 765921    | 771757  | +      | 10      | 59           | 60       | 0                    | 47                       | 20               | 31               | 34   | 44               | 170                 | 0          | 0         | 0         | 62       | 48     |
